# Supplementary material for: IgG Responses to the Plasmodium falciparum Antigen VAR2CSA in Colombia Are Restricted to Pregnancy and Are Not Induced by Exposure to Plasmodium vivax
Source: PubMed Central journal article supplement (PMC6056870; doi:10.1128/iai.00136-18), 2018-07-23

***Supplementary Figure 1. Reactivity of antibody reagents with P. falciparum IEs expressing IT4VAR04 on the surface***

IgG reactivity of IT4VAR04-positive IEs with pools of human plasma (1:20) from Danish control donors (gray), malaria-unexposed Colombians (red), malaria-infected Colombian pregnant women (green), and malaria-exposed Ghanaian women with one or more previous pregnancies (blue) (A). Reactivity of IT4VAR04-positive IEs with the PvDBP-specific mouse monoclonal antibody 3D10 (10 µg/mL) (B, C), an unspecific mouse IgG antibody (D), the PvDBP-specific human monoclonal antibody DBL10 (10 µg/mL) (E), and a rabbit PvDBP-specific serum (F).

***Supplementary Figure 2. Reactivity of antibody reagents with P. falciparum IEs selected to express HB3VAR06 on the surface***

IgG reactivity of HB3VAR06-positive IEs with pools of human plasma from Danish control donors (gray), malaria-unexposed Colombians (red), malaria-infected Colombian pregnant women (green), and malaria-exposed Ghanaian women with one or more previous pregnancies (blue) (A). Reactivity of HB3VAR06-positive IEs with the PvDBP-specific mouse monoclonal antibody 3D10 (B), the PvDBP-specific human monoclonal antibody DBL10 (C), and a rabbit PvDBP-specific serum (D).

***Supplementary Figure 3. Correlation of antibody responses to native and recombinant VAR2CSA-type PfEMP1***

Correlation ( $r_s$ ) of IgG levels against recombinant (FV2<sub>CHO</sub>; determined by ELISA) and corresponding native (IT4VAR04; determined by flow cytometry) VAR2CSA-type PfEMP1 proteins in individual samples from Set 1a/2a (A), 1b/2b (B), and 2c (C). Panel layout as in Fig. 3D.

Supplementary Fig. 1

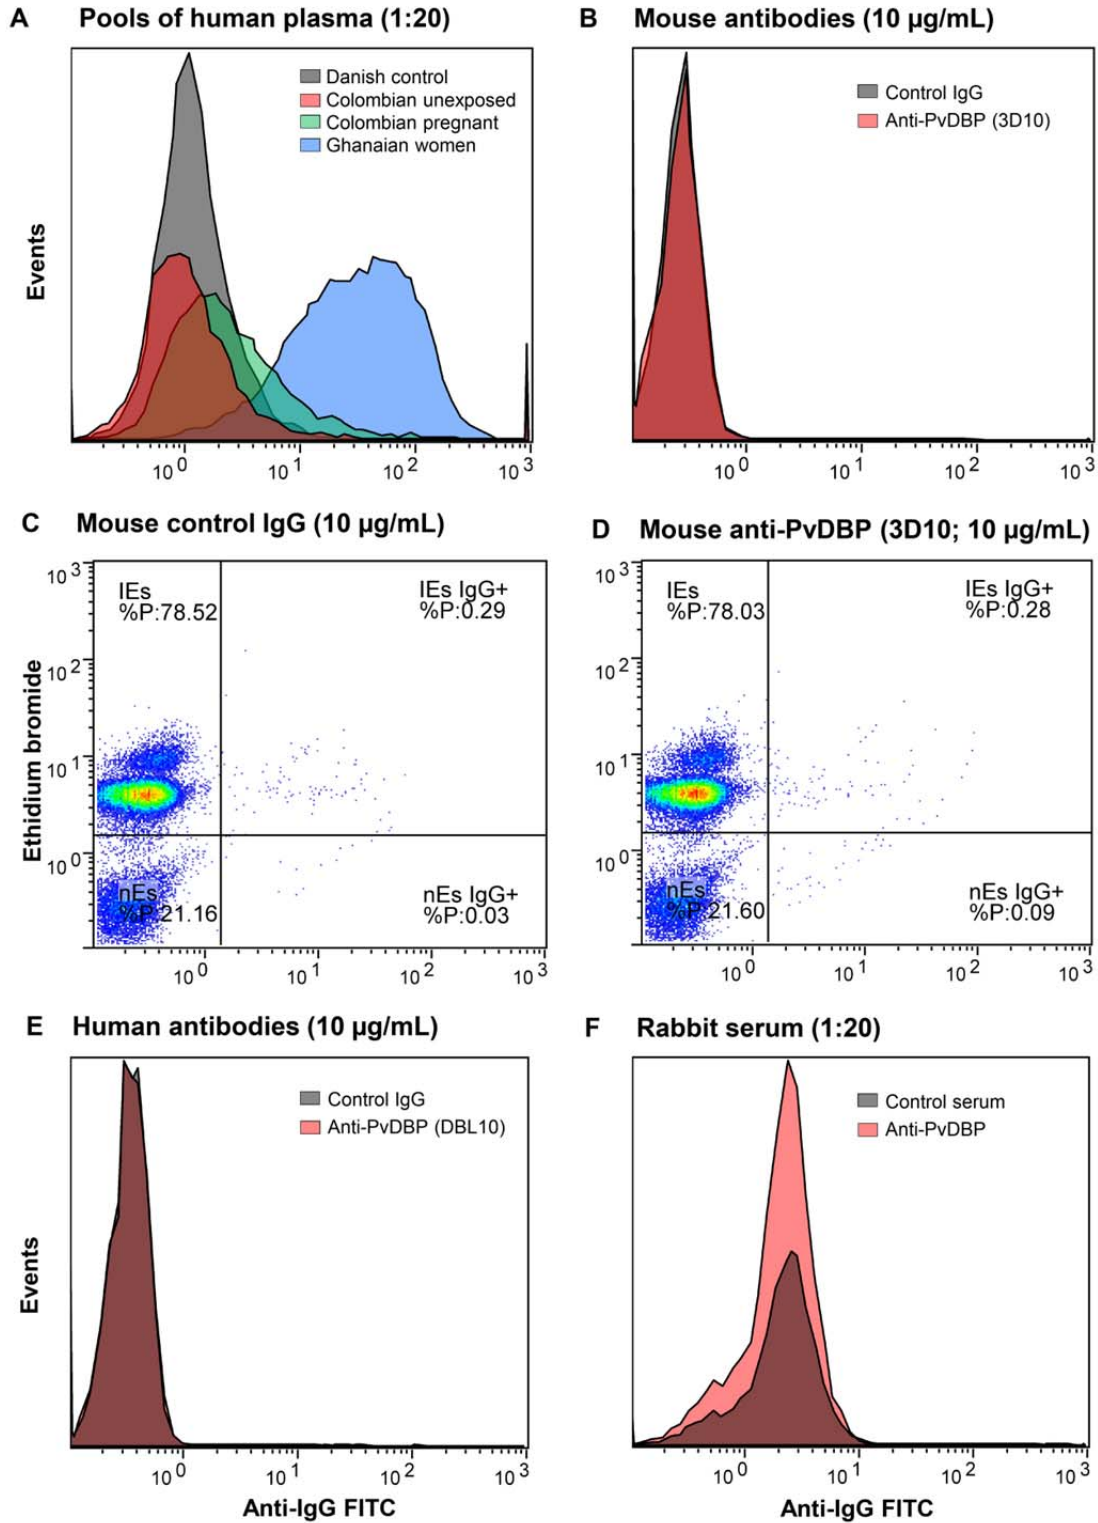

Supplementary Fig. 2

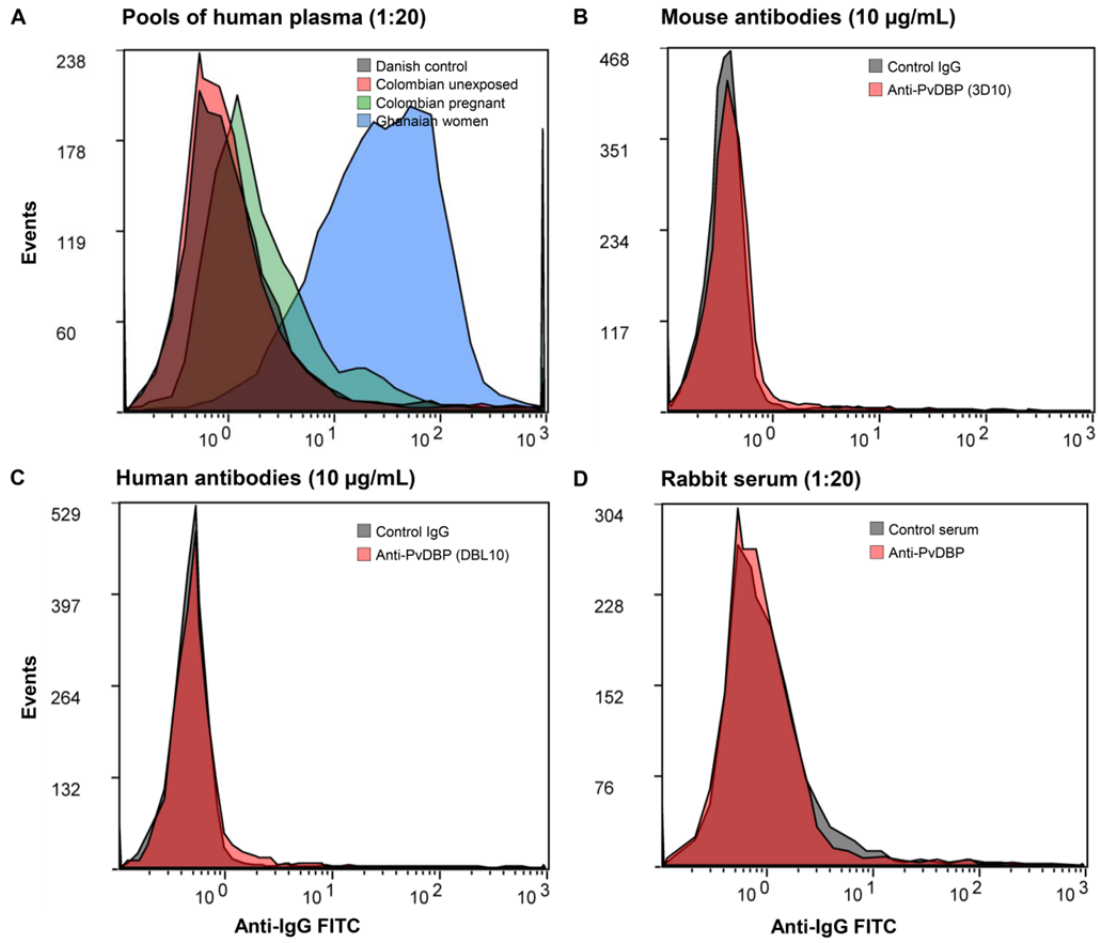

Supplementary Fig. 3

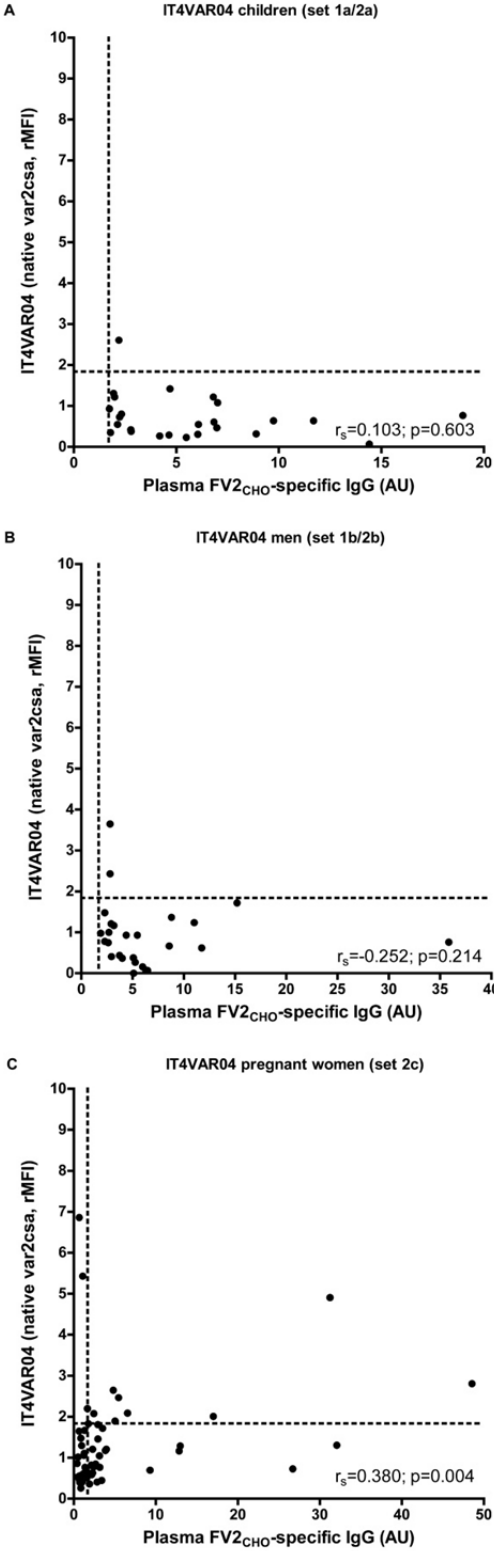

Supplement: IAI.00136-18_zii999092477s1.pdf [file IAI.00136-18_zii999092477s1.pdf]
